# Supplementary material for: The Highly Efficient Synthesis of 1,2-Disubstituted Benzimidazoles Using Microwave Irradiation
Source: MDPI journal article supplement (doi:10.3390/molecules27051751), 2022-03-07

# The Highly Efficient Synthesis of 1,2-Disubstituted Benzimidazoles Using Microwave Irradiation

Monica Nardi <sup>1,\*</sup>, Sonia Bonacci <sup>1</sup>, Natividad Herrera Cano <sup>2</sup>, Manuela Oliverio <sup>1</sup> and Antonio Procopio <sup>1</sup>

<sup>1</sup> Dipartimento di Scienze della Salute, Università Magna Græcia, Viale Europa, Germaneto, 88100 Catanzaro, CZ, Italy; s.bonacci@unicz.it (S.B.); m.oliverio@unicz.it (M.O.); procopio@unicz.it (A.P.)

<sup>2</sup> Departamento Química Orgánica, Facultad de Ciencias Químicas, ICYTAC, CONICET and Universidad Nacional de Córdoba, Ciudad Universitaria, Bv. Juan Filloy s/n, Córdoba 5000, Argentina; nhc@fcq.unc.edu.ar

\* Correspondence: monica.nardi@unicz.it; Tel.: +39-0961-3694116

Electronic Supplementary Material

## Table of Contents

|                                                                                     |
|-------------------------------------------------------------------------------------|
| <i>Experimental Section</i>                                                         |
| <i>General Procedure for the Synthesis of 1,2-Substituted Benzimidazoles 1a-8a.</i> |
| <i>General Procedure for the Synthesis of 1,2-Substituted Benzimidazoles 1b-3b.</i> |
| <b>1-Benzyl-2-phenyl-1H-benzimidazole (1b)</b>                                      |
| <b>1-Benzyl-2-(p-tolyl)-1H-benzimidazole (2b)</b>                                   |
| <b>1-Benzyl-2-(4-methoxyphenyl)-1H-benzo[d]imidazole (3b)</b>                       |

## Experimental Section

All reactions were monitored by GC-MS Shimadzu workstation. It is constituted by a GC 2010 (equipped with a 30 m-QUADREX 007-5MS capillary column, operating in the "split" mode, 1 mL min<sup>-1</sup> flow of He as carrier gas).

<sup>1</sup>H-NMR and <sup>13</sup>C-NMR spectra were recorded at 300 MHz and at 75 MHz respectively, using a Bruker WM 300 system. The samples solubilized in CDCl<sub>3</sub> using tetramethylsilane (TMS) as reference ( $\delta$  0.00). Chemical shifts are given in parts per million (ppm) and coupling constants (J) are given in hertz. For <sup>13</sup>C-NMR the chemical shifts are relative to CDCl<sub>3</sub> ( $\delta$  77.0).

Synthos 3000 instrument from Anton Paar, equipped with a 4 × 24MG5 Rotor, used for the MW-assisted reactions. An external IR sensor monitors the temperature at the base of each reaction vessel.

### *General Procedure for the Synthesis of 1-phenyl-2-Aryl(alkyl) Benzimidazoles 1a-11a.*

To the *N*-phenyl-*o*-phenyldiammine (1 mmol) and Er(OTf)<sub>3</sub> (1% mol) in a 3 mL glass vial, the aryl or alkyl aldehyde (1 mmol) was added. The mixture was reacted for 5 min in a Synthos 3000 microwave instrument, fixed on a temperature value of 60 °C (IR limit). The reaction was monitored by TLC and GC/MS analysis. After completion conversion of *N*-phenyl-*o*-phenyldiammine, the Er(OTf)<sub>3</sub> was separated from the reaction mixture adding water (to separate the catalyst from the reaction mixture) and extracting the organic product with ethyl acetate (4×3 mL). The products were isolated after organic phases dried over Na<sub>2</sub>SO<sub>4</sub>, followed by evaporation under reduced pressure (1a–10a in 91–99% yields). Spectral data were in accordance with the literature [71]

### *General Procedure for the Synthesis of 1-benzyl-2-Aryl-Benzimidazoles 1b-3b.*

To the *N*-benzyl-*o*-phenyldiammine (1 mmol) and Er(OTf)<sub>3</sub> (1% mmol) in a 3 mL glass vial, the benzaldehyde or *p*-substituted-benzaldehyde (1 mmol) was added. The mixture reaction was reacted in the same reaction conditions previously reported (MW irradiation for 5 min). After completion conversion of *N*-phenyl-*o*-phenyldiammine, the Er(OTf)<sub>3</sub> was separated from the reaction mixture adding water and extracting the organic product with ethyl acetate (4×3 mL). The products were isolated after organic phases dried over Na<sub>2</sub>SO<sub>4</sub>, followed by evaporation under reduced pressure. Spectral data were in accordance with the literature [72-74].

**1-Benzyl-2-phenyl-1H-benzimidazole (1b):** White solid; m.p. 132–134 °C [72], <sup>1</sup>H NMR (300 MHz, CDCl<sub>3</sub>,  $\delta$  ppm (J, Hz): 7.87 (d, J=7.8 Hz, 1 H), 7.71 (d, J=7.8 Hz, 2 H), 7.50–7.44 (m, 3 H), 7.34–7.20 (m, 6 H), 7.10 (d, J=6.7 Hz, 2 H), 5.48 (s, 2 H); <sup>13</sup>C NMR (75 MHz, CDCl<sub>3</sub>)  $\delta$  ppm: 154.2, 143.1, 136.2, 136.0, 130.0, 129.7, 129.1, 129.0, 128.5, 127.6, 125.8, 122.8, 122.5, 119.8, 110.1, 48.2. Anal. Calcd for C<sub>20</sub>H<sub>16</sub>N<sub>2</sub>: C, 84.50; H, 5.63; N, 9.85 Found: C, 84.51; H, 5.69; N, 9.80

**1-Benzyl-2-(*p*-tolyl)-1H-benzimidazole (2b):** White solid. Mp: 129-131° [78] C. <sup>1</sup>H-NMR (300 MHz, CDCl<sub>3</sub>):  $\delta$  = 7.87 (d, J = 8.0 Hz, 1H), 7.59 (d, J = 8.0 Hz, 2H), 7.31-7.27 (m, 4H), 7.24 (d, J = 8.0 Hz, 2H), 7.21-7.19 (m, 2H), 7.01 (d, J = 6.8 Hz, 2H), 5.43 (s, 2H), 2.39 (s, 3H); <sup>13</sup>C NMR (75 MHz, CDCl<sub>3</sub>):  $\delta$  = 154.34, 143.15, 140.10, 136.51, 136.09, 129.48, 129.17, 129.06, 127.75, 127.13, 125.98, 122.91, 122.63, 119.88, 110.49, 48.39, 21.45. HRMS calcd for C<sub>21</sub>H<sub>18</sub>N<sub>2</sub> [(M+H)<sup>+</sup>]: 299.1543; found, 299.1550.

**1-Benzyl-2-(4-methoxyphenyl)-1H-benzimidazole (3b).** White solid . Mp: 133-135 °C [79]. <sup>1</sup>H-NMR (300 MHz, CDCl<sub>3</sub>): δ = 7.86 (d, J = 8.0 Hz, 1H), 7.63 (d, J = 8.4 Hz, 2H), 7.33-7.24 (m, 2H), 7.21 (dd, J = 14.8 Hz, 8.0 Hz, 2H), 7.09 (d, J = 6.8 Hz, 2H), 6.96-6.93 (m, 2H), 5.41 (s, 2H), 3.81 (s, 3H); <sup>13</sup>C NMR (75 MHz, CDCl<sub>3</sub>): δ = 160.95, 154.18, 143.22, 136.55, 136.16, 130.70, 129.08, 127.75, 125.96, 122.79, 122.59, 122.41, 119.76, 114.23, 110.40, 55.37, 48.38. HRMS calcd for C<sub>21</sub>H<sub>18</sub>N<sub>2</sub>O [(M+H)<sup>+</sup>]: 315.1492; found, 315.1496.

**1-Benzyl-2-phenyl-1H-benzimidazole (1b):**

<sup>1</sup>H-NMR

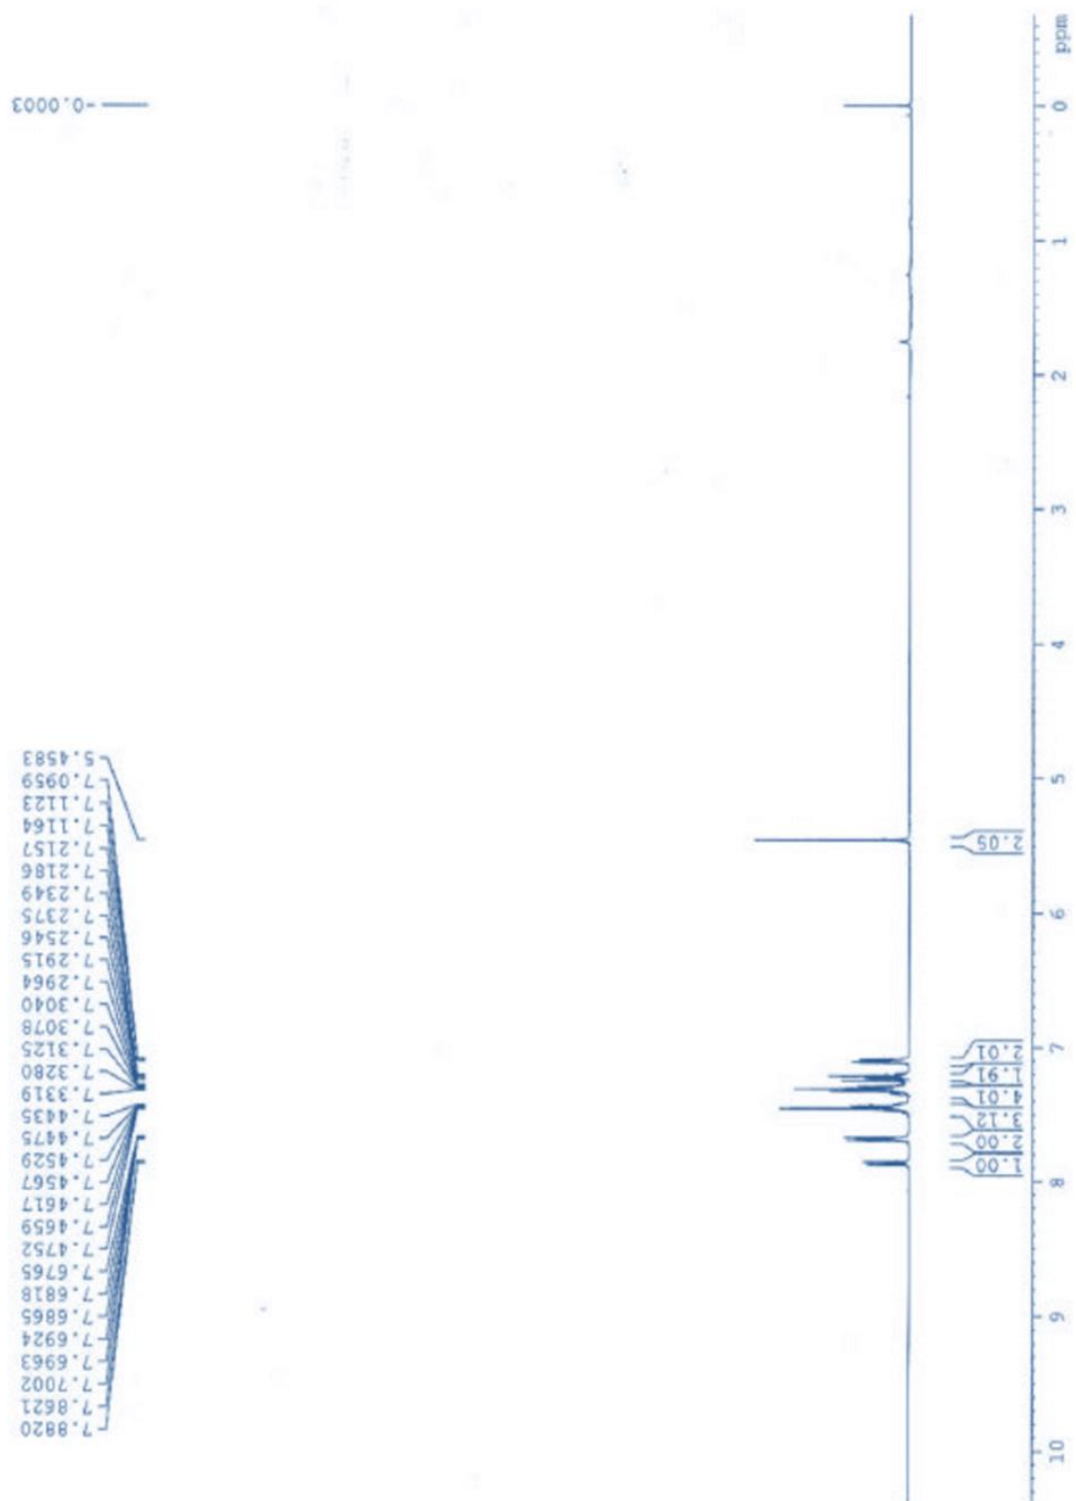

$^{13}\text{C}$ -NMR

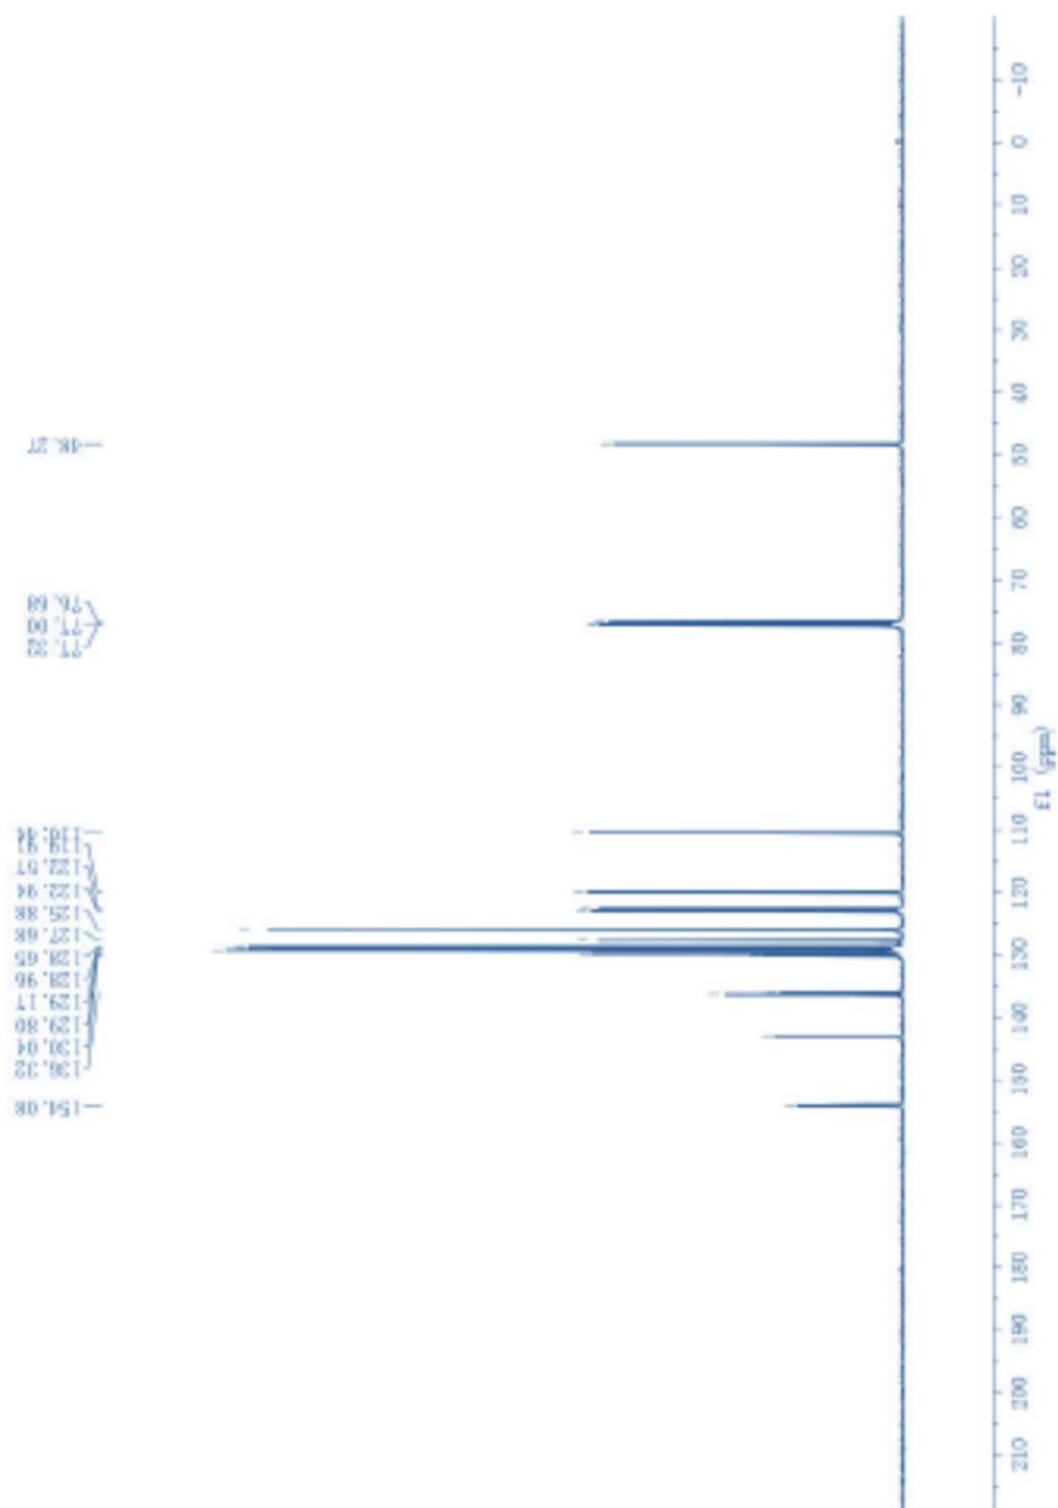

1-Benzyl-2-(p-tolyl)-1H-benzimidazole (2b)

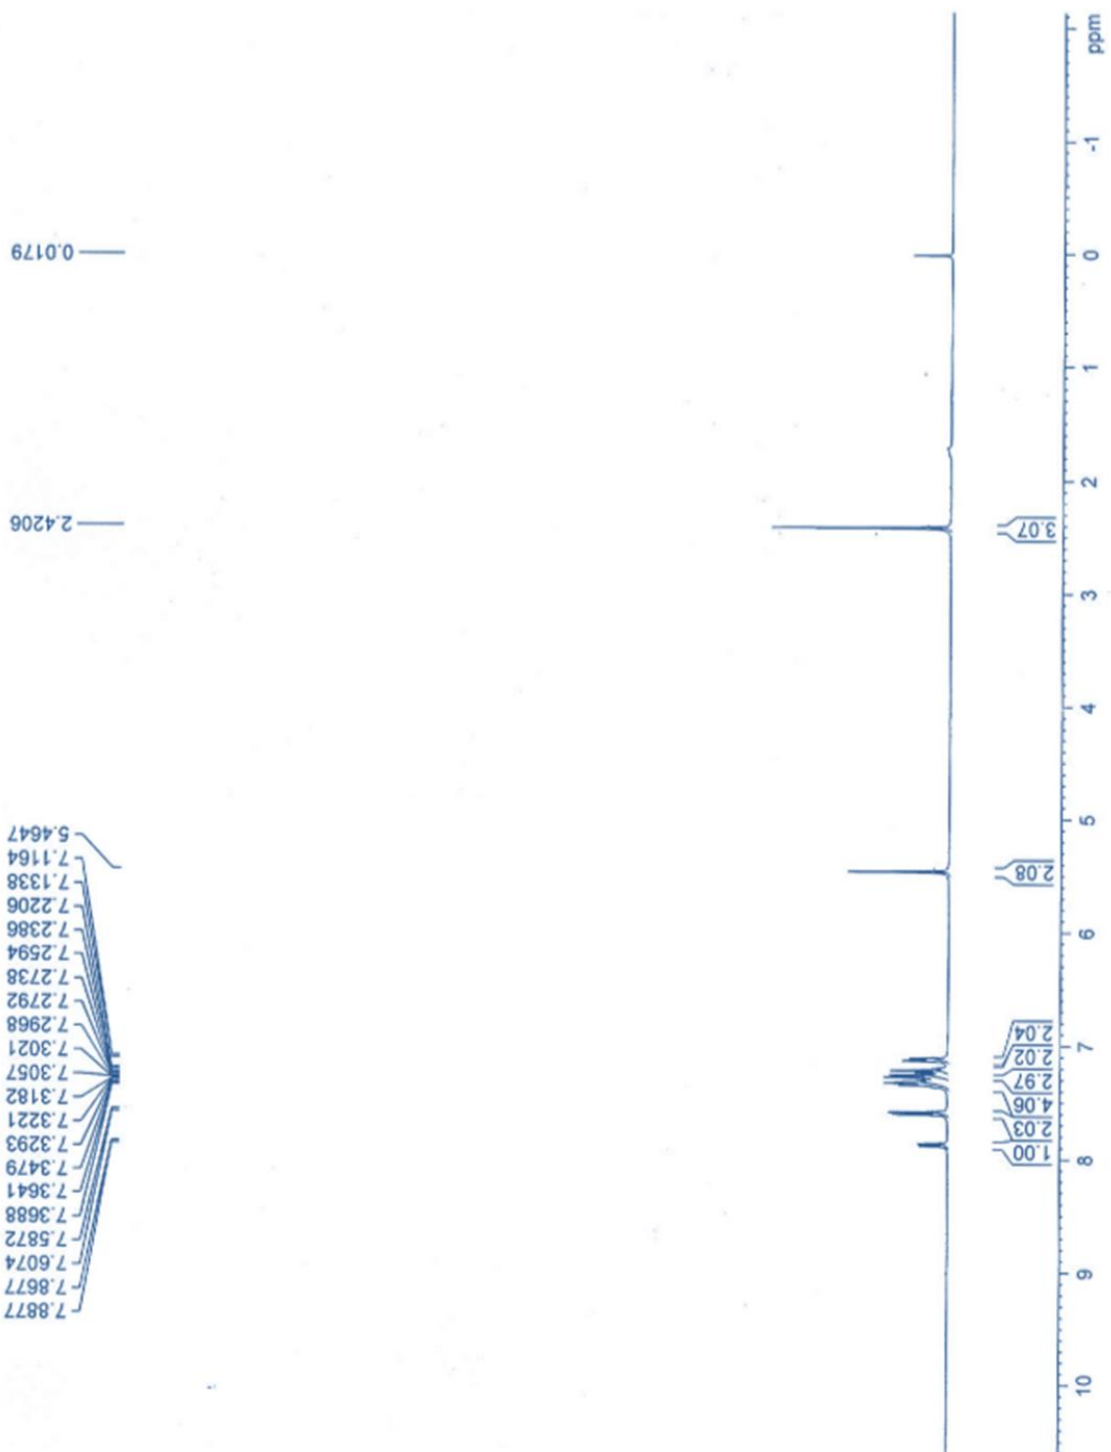

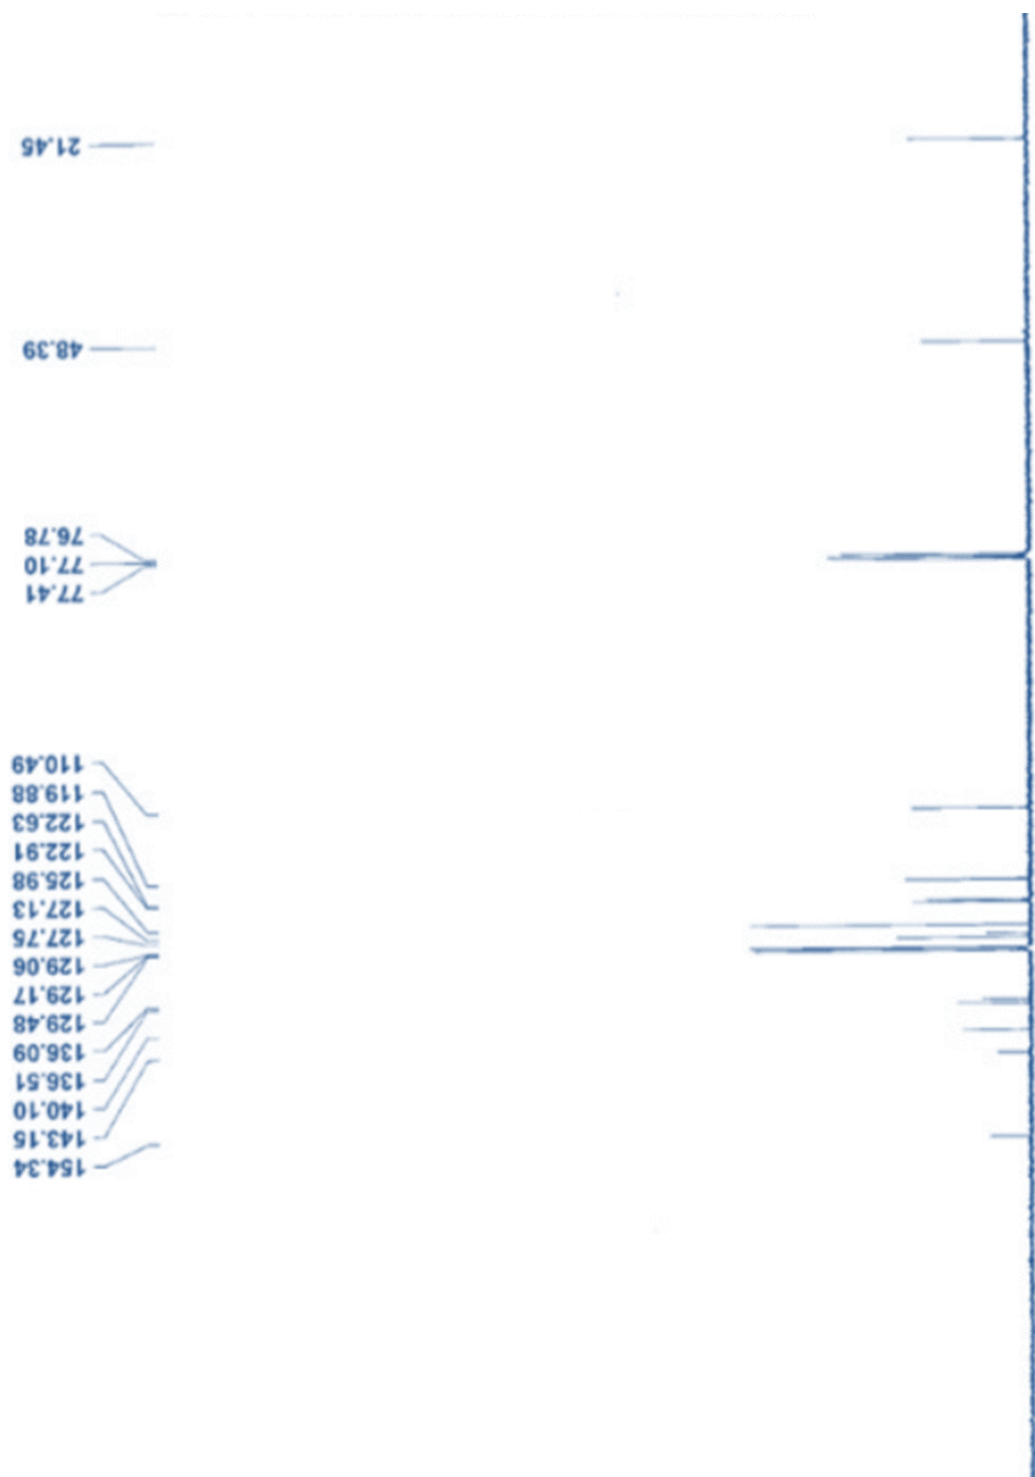

1-Benzyl-2-(4-methoxyphenyl)-1H-benzimidazole (3b).



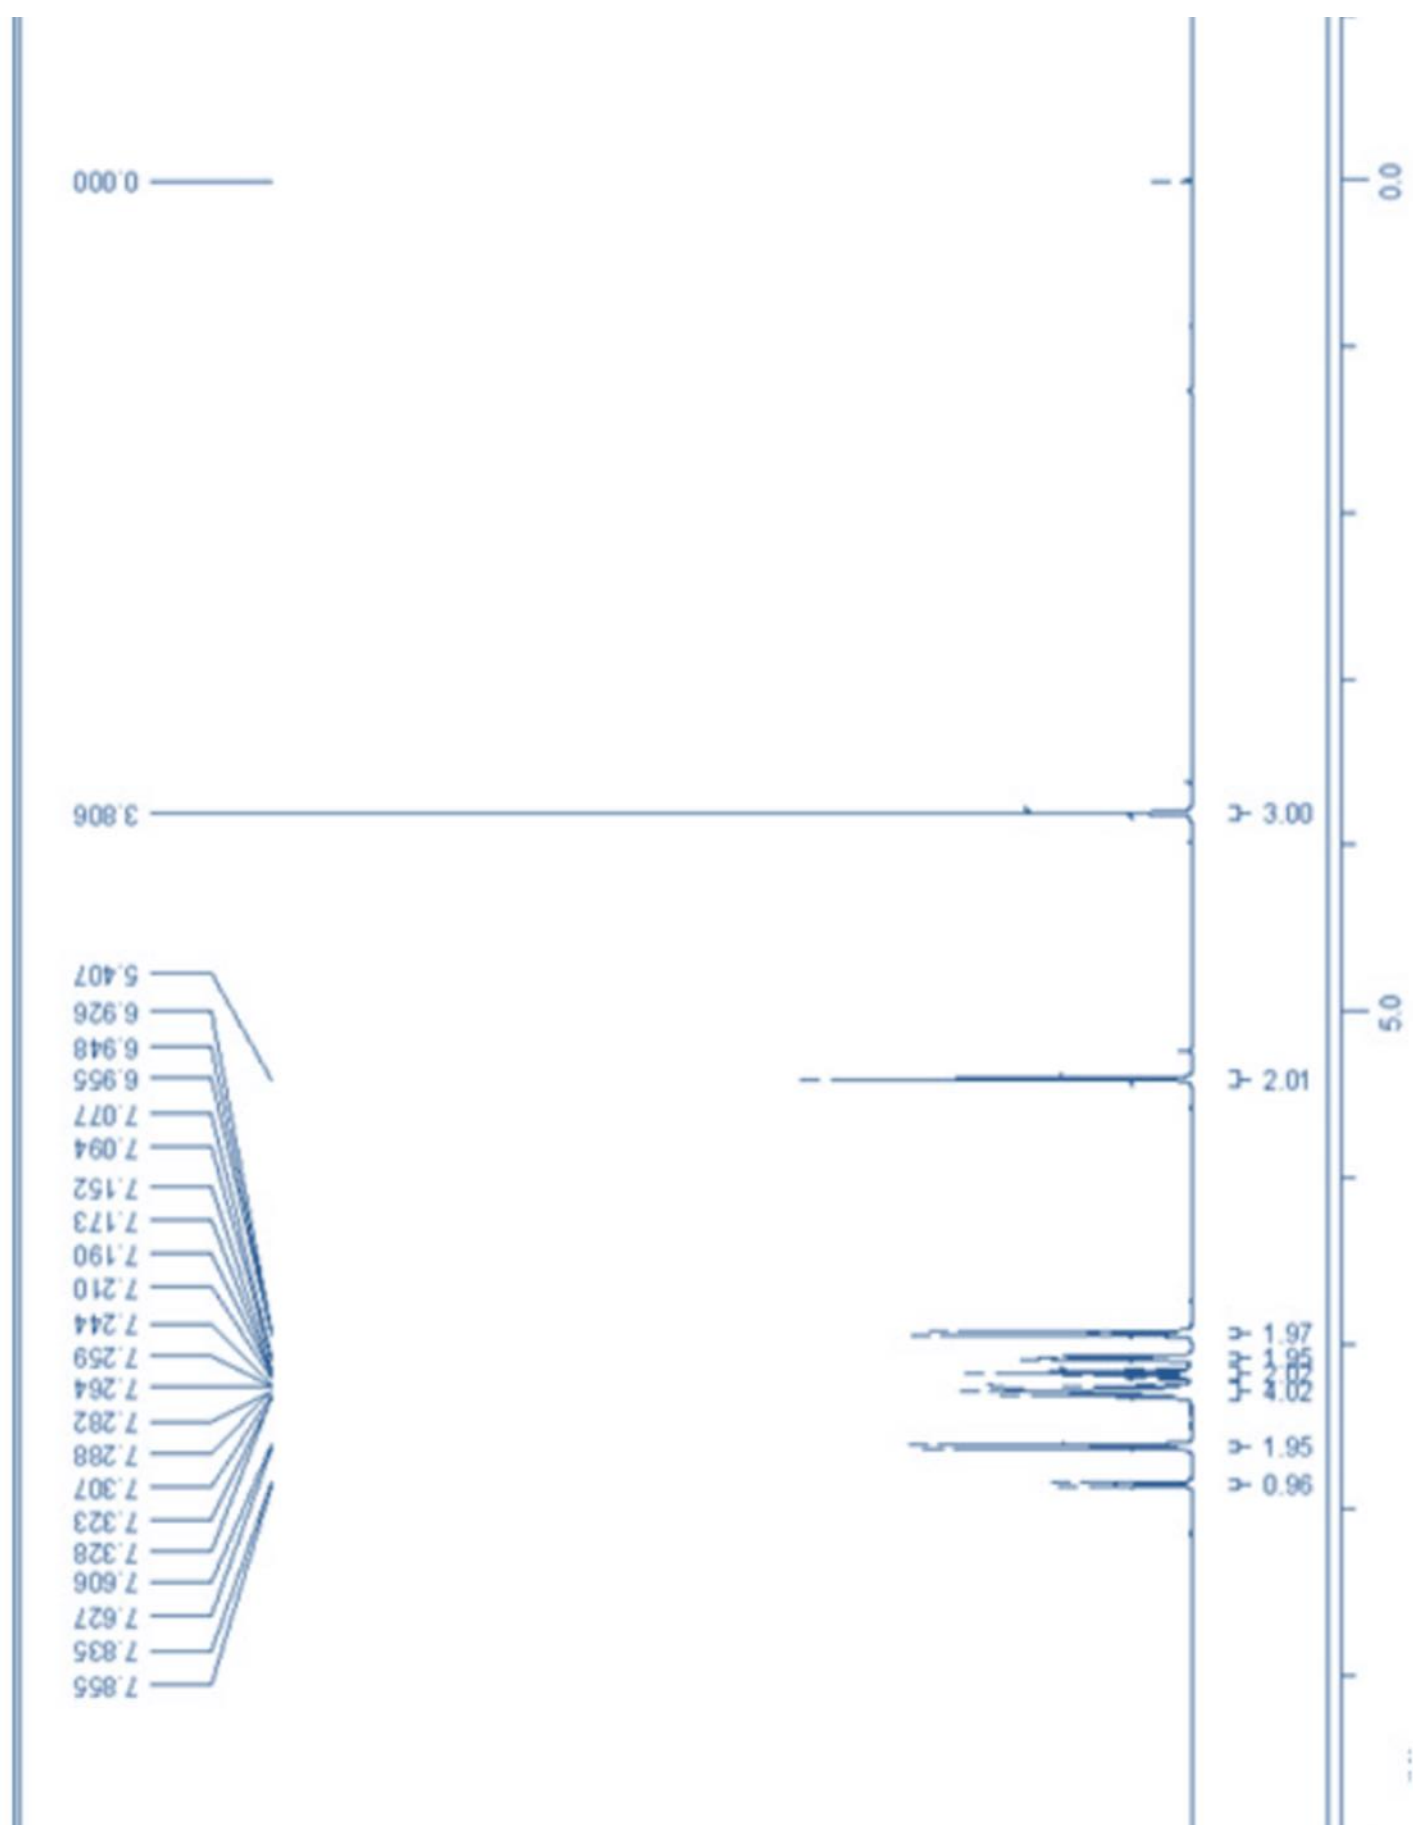

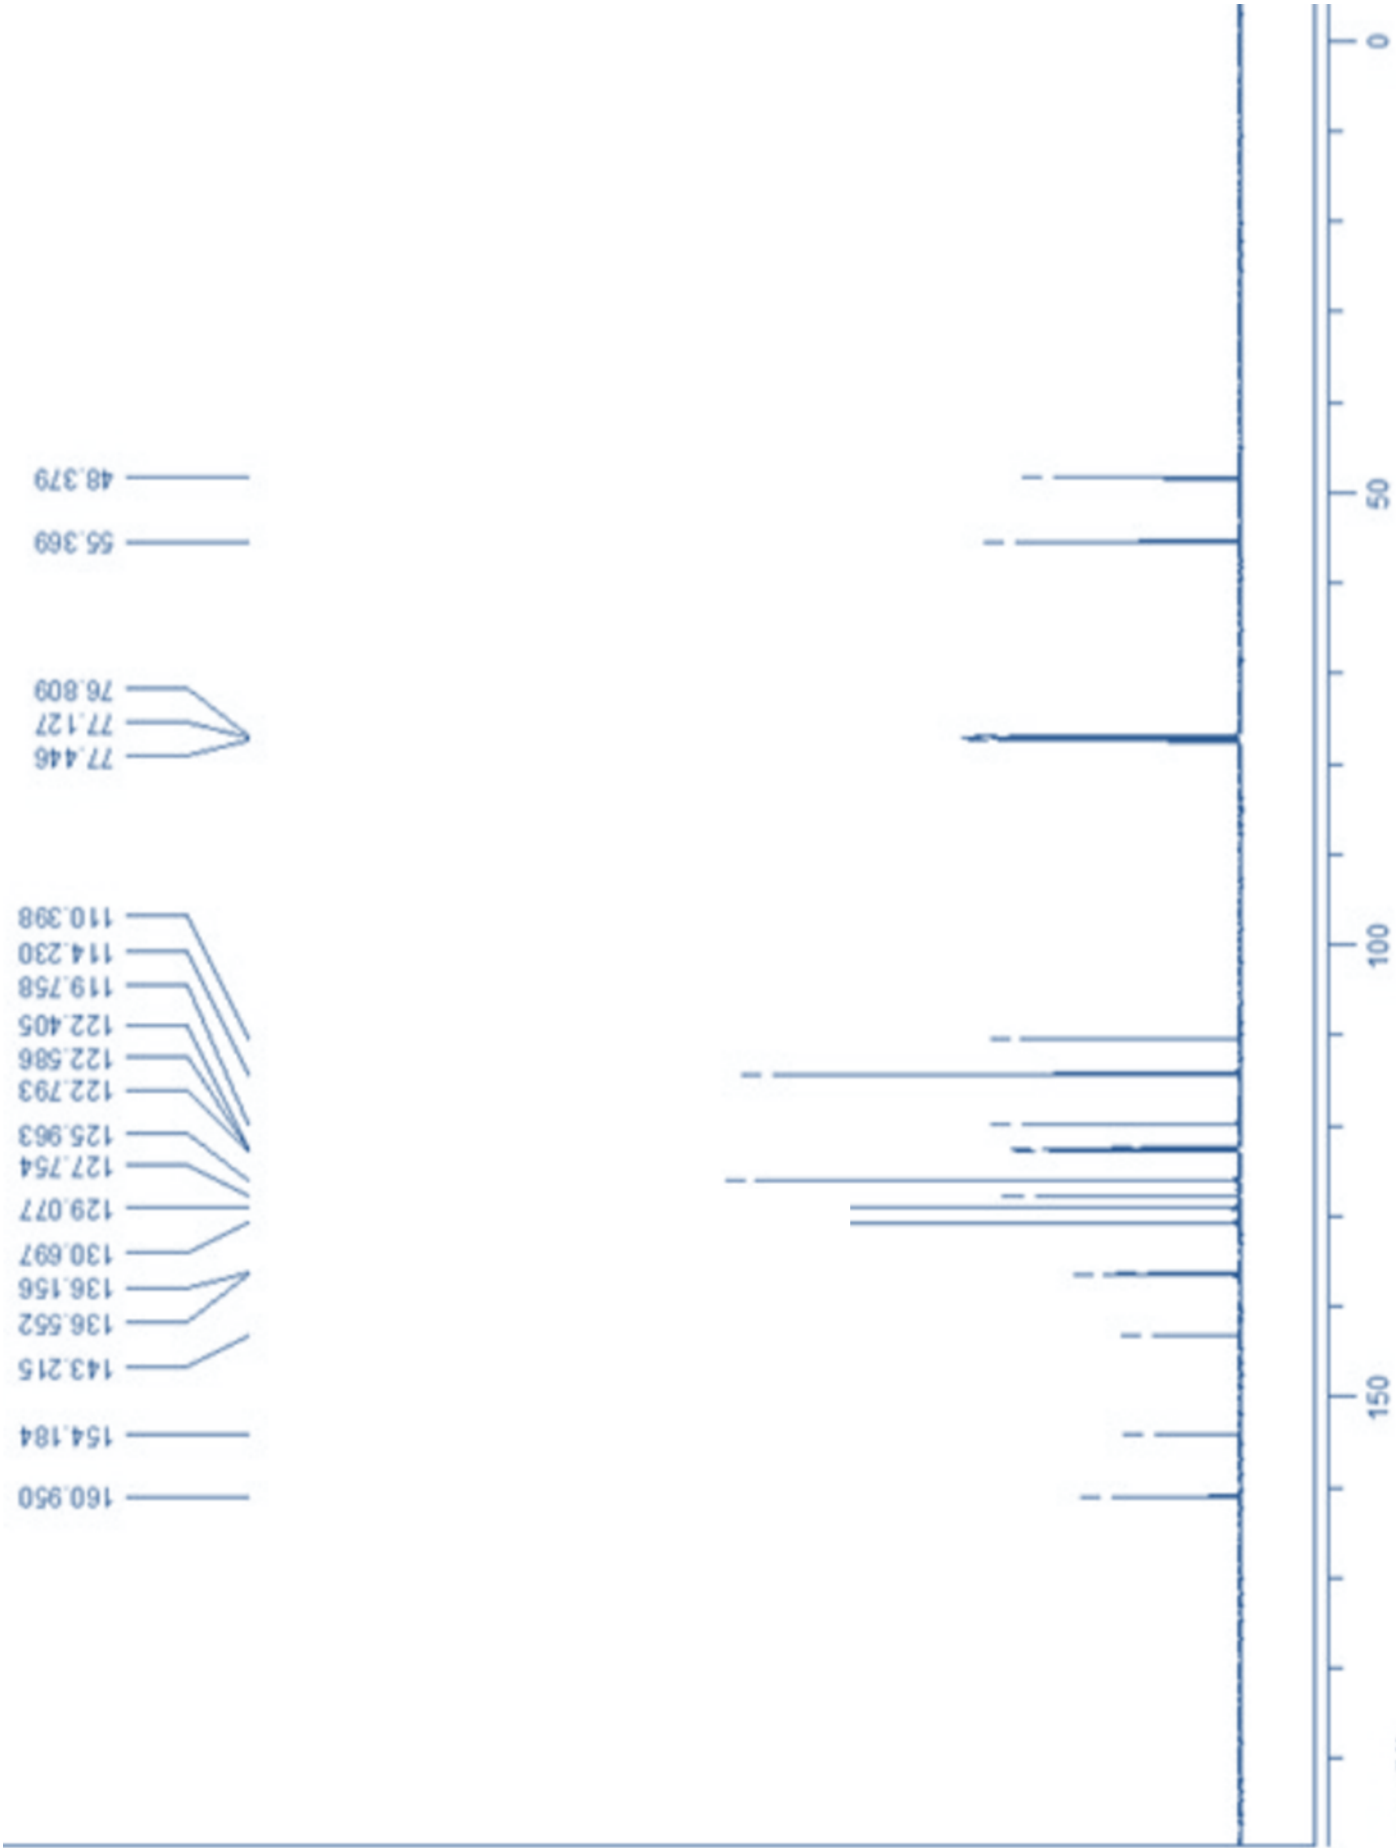

Supplement: s1 [file s1]
